# Supplementary material for: Transistor performance of a “push-pull”, π-stacked bithiazole-ethylenedioxythiophene co-oligomer
Source: Royal Society of Chemistry journal article supplement (doi:10.1039/b807405d), 2008-01-01
Supplement: b807405d.pdf [file b807405d.pdf]

Supporting Information to:

" Transistor performance of a "push-pull",  $\pi$ -stacked bithiazole-ethylenedioxythiophene co-oligomer "

*Hyunsik Moon, Woong Sang Jahng, and M. David Curtis\**

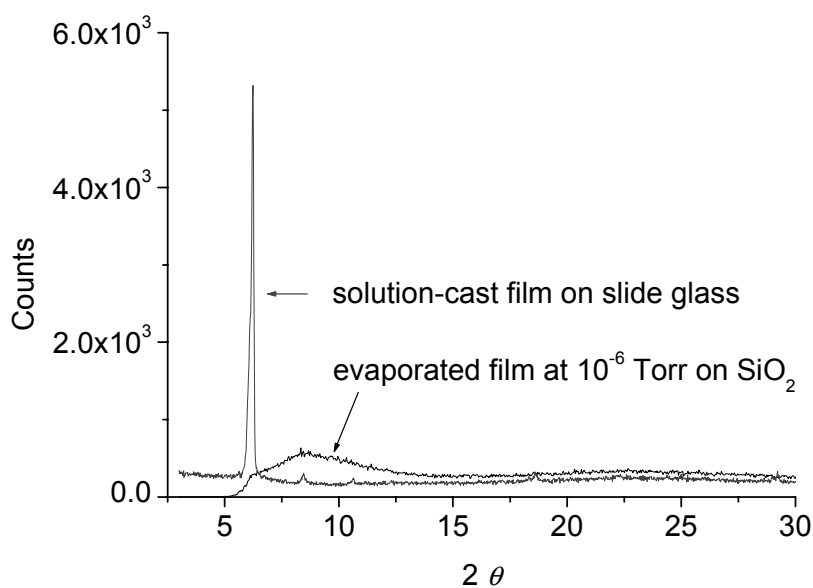

**Figure S1.** X-ray diffraction patterns of **BT<sub>2</sub>B** films from solution and vacuum-evaporation processes.

**Table S1.** Conditions for solution-casting of **BT<sub>2</sub>B**

|               | Concentration | Dielectrics                  |
|---------------|---------------|------------------------------|
| Xylene        | 1 mg/mL       | $\text{SiO}_2$ ,             |
| Toluene       | 1 mg/mL       | Octyltrimethoxysilane-       |
| Chlorobenzene | 2 mg/mL       | treated $\text{SiO}_2$ ,     |
| Bromobenzene  | 2 mg/mL       | Spin-coated polyvinylalcohol |

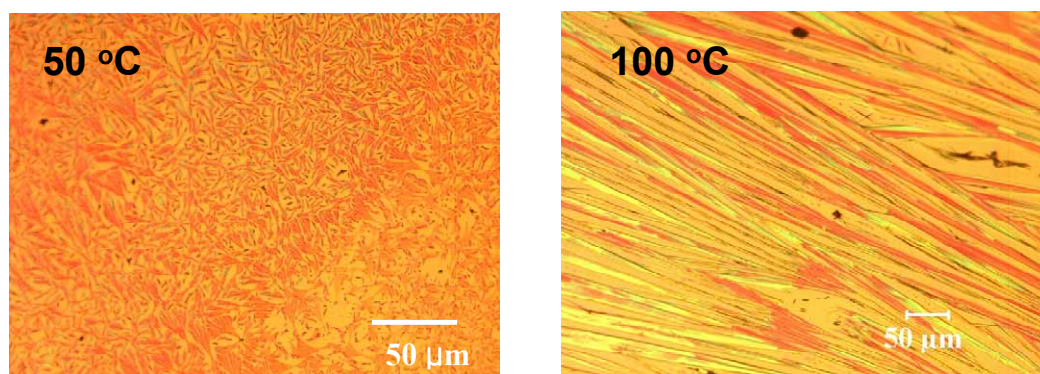

**Figure S2.** **BT<sub>2</sub>B** crystals (yellow in images) grown from a bromobenzene solution on SiO<sub>2</sub>/Si substrates at different substrate temperatures.
